# Supplementary material for: A satellite chronology of plumes from the April 2021 eruption of La Soufrière, St Vincent
Source: Copernicus journal article supplement (doi:10.5194/acp-23-15209-2023), 2023-12-14
Supplement: Supplementary file 1 [file acp-23-15209-2023-supplement.zip]

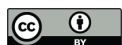

## *Supplement of*

# **A satellite chronology of plumes from the April 2021 eruption of La Soufrière, St Vincent**

**Isabelle A. Taylor et al.**

*Correspondence to:* Isabelle A. Taylor ([isabelle.taylor@physics.ox.ac.uk](mailto:isabelle.taylor@physics.ox.ac.uk))

- [acp-23-15209-2023-supplement-title-page.pdf](#)
- [Figure09\\_data.xlsx](#)
- [IASI\\_column\\_amount\\_20210409\\_20210430.gif](#)
- [IASI\\_column\\_amount\\_error\\_20210409\\_20210430.gif](#)
- [IASI\\_height\\_20210409\\_20210430.gif](#)
- [IASI\\_height\\_error\\_20210409\\_20210430.gif](#)

The copyright of individual parts of the supplement might differ from the article licence.
